# Supplementary material for: Trends and regional differences in antidiabetic medication use: a nationwide retrospective observational study
Source: Springer Nature journal article supplement (doi:10.1186/s13098-024-01334-8), 2024-04-24

# Supplementary material 1.: Utilization tendencies of antidiabetic medication in Hungarian regions between 2015 and 2021

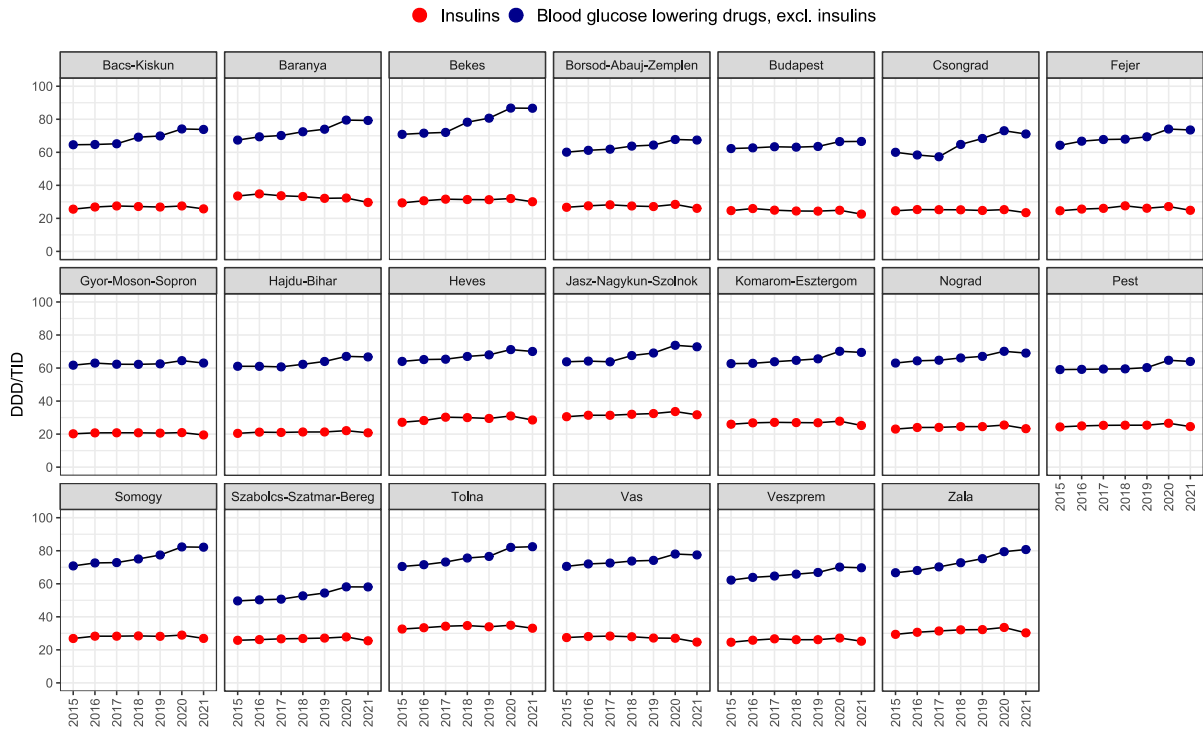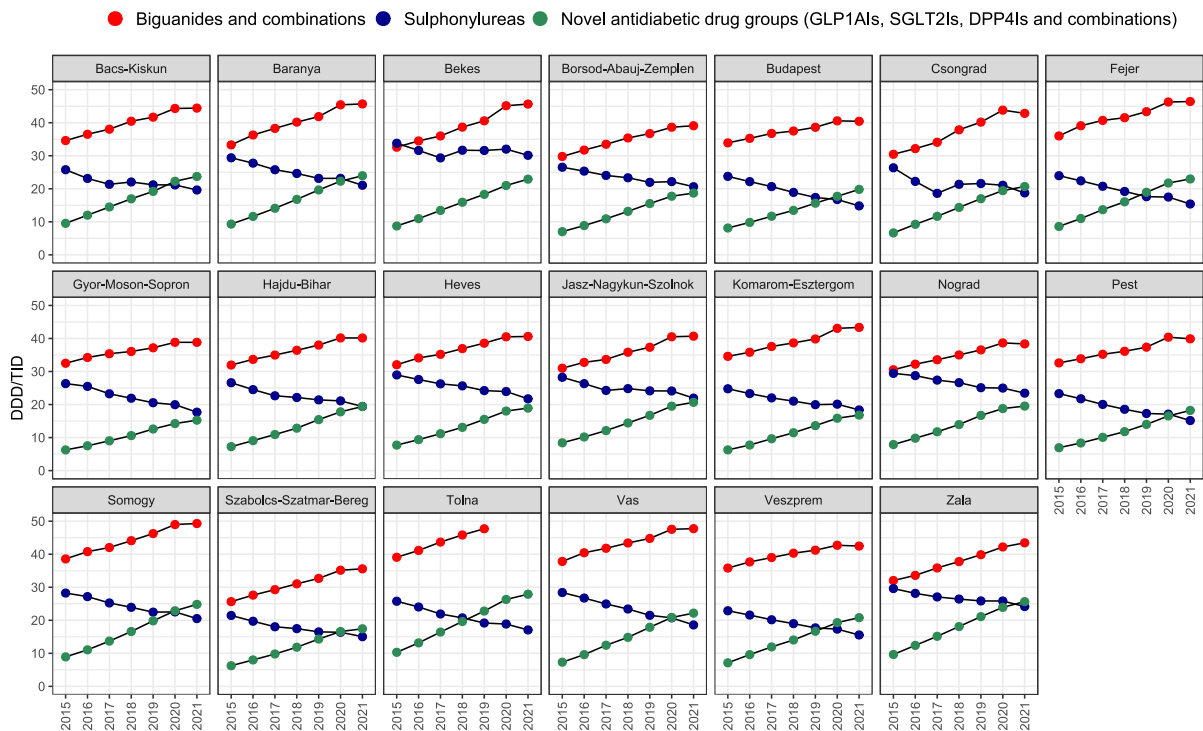

● DPP4Is and combinations ● GLP1As and combinations ● SGLT2Is and combinations

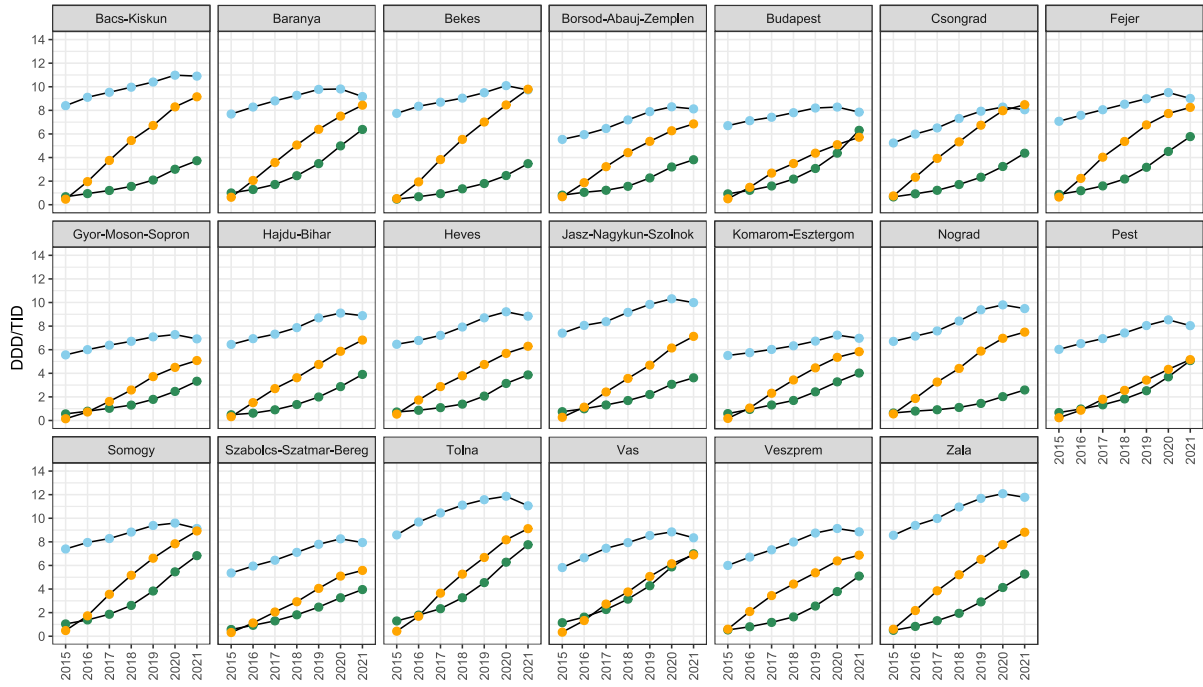

Supplement: MOESM1 [file 27012228]
