# Supplementary material for: Trends and regional differences in antidiabetic medication use: a nationwide retrospective observational study
Source: Springer Nature journal article supplement (doi:10.1186/s13098-024-01334-8), 2024-04-24
Supplement: MOESM2 [file 27012228]

## Supplementary material 2.: Available fixed-dose combinations in Hungary during the study period

| Pharmacological class:             | Insulin and combinations                                             | Metformin combinations                                                                                                                                                                                                                                                                                  | DPP4Is combinations                                                                                                                                                                                           | GLP1As combinations                                                  | SGLT2Is combinations                                                                                                       |
|------------------------------------|----------------------------------------------------------------------|---------------------------------------------------------------------------------------------------------------------------------------------------------------------------------------------------------------------------------------------------------------------------------------------------------|---------------------------------------------------------------------------------------------------------------------------------------------------------------------------------------------------------------|----------------------------------------------------------------------|----------------------------------------------------------------------------------------------------------------------------|
| <b>Name of active ingredients:</b> | Insulin glargine and lixisenatid<br>Insulin degludec and liraglutide | Metformin and rosiglitazone<br>Metformin and pioglitazone<br>Metformin and sitagliptin<br>Metformin and vildagliptin<br>Metformin and saxagliptin<br>Metformin and linagliptin<br>Metformin and alogliptin<br>Metformin and dapagliflozin<br>Metformin and empagliflozin<br>Metformin and ertugliflozin | Metformin and sitagliptin<br>Metformin and vildagliptin<br>Pioglitazone and alogliptin<br>Metformin and saxagliptin<br>Metformin and linagliptin<br>Metformin and alogliptin<br>Sitagliptin and ertugliflozin | Insulin glargine and lixisenatid<br>Insulin degludec and liraglutide | Metformin and dapagliflozin<br>Metformin and empagliflozin<br>Metformin and ertugliflozin<br>Sitagliptin and ertugliflozin |

Supplemental reference:

1. National Health Insurance Fund of Hungary. Public Medication Database. Available at

[https://www.neak.gov.hu/felso\\_menu/szakmai\\_oldalak/gyogyszer\\_segedeszkoz\\_gyogyfurdo\\_tamogatas/egeszsegugyi\\_vallalkozasoknak/pupha/Vegleges\\_PUPHA](https://www.neak.gov.hu/felso_menu/szakmai_oldalak/gyogyszer_segedeszkoz_gyogyfurdo_tamogatas/egeszsegugyi_vallalkozasoknak/pupha/Vegleges_PUPHA). Last accessed 04 March 2024.
