# Supplementary material for: Trends and regional differences in antidiabetic medication use: a nationwide retrospective observational study
Source: Springer Nature journal article supplement (doi:10.1186/s13098-024-01334-8), 2024-04-24
Supplement: MOESM3 [file 27012228]

### **Supplementary material 3.: Calculation of DDD/TID**

#### **Example: Total national antidiabetic utilization in 2015**

The sum of the DDDs of antidiabetic medications in 2015 in Hungary from the IQVIA database: 316 674 671,7

The population in Hungary in 2015: 9 843 028

The following formula was used to calculate DDD/TID: (total number of DDDs used in 1 year x 1000) / (population x 365).

Defined Daily Dose per 1000 inhabitants per day =  $(316\,674\,671,7 \times 1000) / (9\,843\,028 \times 365) = 88.1$  DDD/TID
